# Supplementary material for: Directed self-assembly of viologen-based 2D semiconductors with intrinsic UV–SWIR photoresponse after photo/thermo activation
Source: PubMed Central journal article supplement (PMC7055315; doi:10.1038/s41467-020-14986-7), 2020-03-04
Supplement: 41467_2020_14986_MOESM1_ESM.pdf [file 41467_2020_14986_MOESM1_ESM.pdf]

# Supplementary Information

## Directed Self-Assembly of Viologen-based 2D Semiconductors with Intrinsic UV–SWIR Photoresponse after Photo/thermo Activation

Xiao-Qing Yu,<sup>†,§</sup> Cai Sun,<sup>†</sup> Bin-Wen Liu,<sup>†</sup> Ming-Sheng Wang<sup>†\*</sup> & Guo-Cong Guo<sup>†</sup>

<sup>†</sup>*State Key Laboratory of Structural Chemistry, Fujian Institute of Research on the Structure of Matter, Chinese Academy of Sciences (CAS), 155 Yangqiao Road West, Fuzhou, Fujian 350002, China*

<sup>§</sup>*University of Chinese Academy of Sciences, No.19A Yuquan Road, Beijing 100049, China*

\*email: [mawang@fjirsm.ac.cn](mailto:mawang@fjirsm.ac.cn) (M.-S. Wang)

### Index

|                                                |    |
|------------------------------------------------|----|
| 1 Supplementary Figures. ....                  | 2  |
| 2 Supplementary Tables. ....                   | 11 |
| 3 Supplementary Note 1: .....                  | 12 |
| Measurement of the relative spin density. .... | 12 |

## 1 Supplementary Figures.

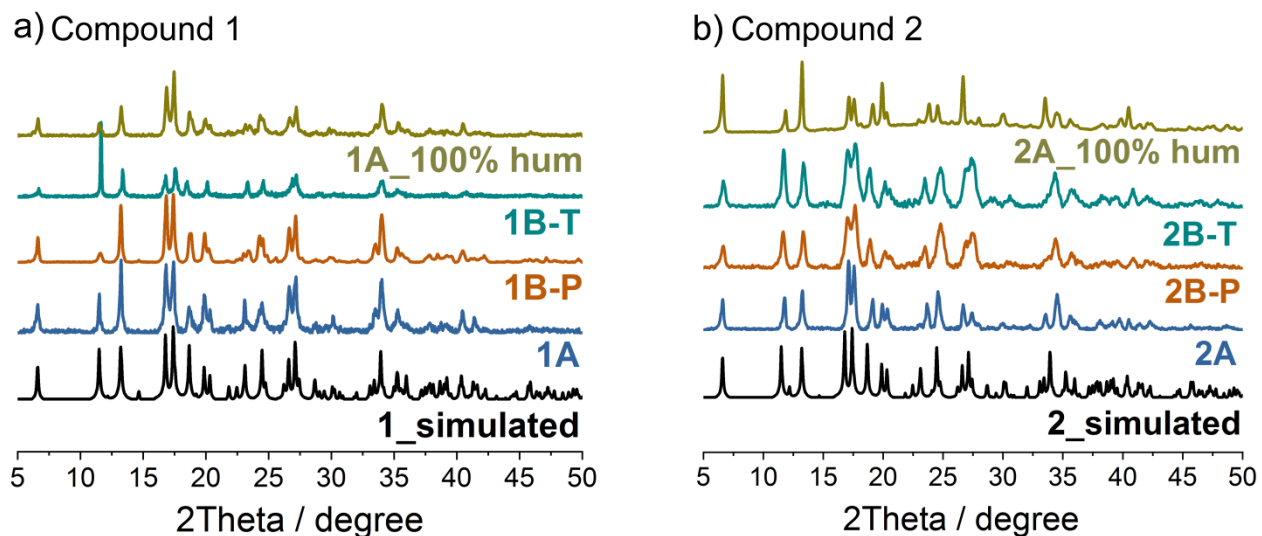

**Supplementary Fig. 1** PXRD patterns of 1 and 2. a) 1\_simulated, 1A, 1B-P, 1B-T, 1A\_100% hum; b) 2\_simulated, 2A, 2B-P, 2B-T, 2A\_100% hum. Note: 1\_simulated/2\_simulated refer to simulated PXRD curves that were simulated using the single-crystal X-ray diffraction data. 1A/2A are as-prepared crystalline samples; 1B-P/2B-P are samples that were irradiated by an Xe lamp for 70 min; 1B-T/2B-T are samples that were thermally annealed at 180 °C for 150 min; 1A\_100% hum/2A\_100% hum are samples that were placed in the dark under the 100% relative humidity for 12 h.

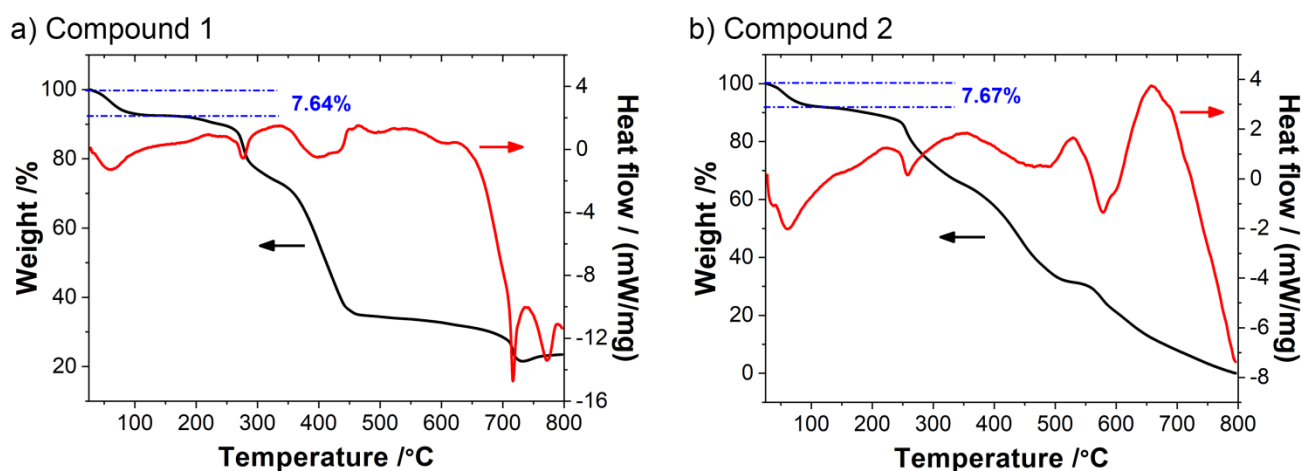

**Supplementary Fig. 2** Thermogravimetric analysis. The data for 1A (a) and 2A (b) measured in nitrogen atmosphere with a ramp rate of 5 °C min<sup>-1</sup>.

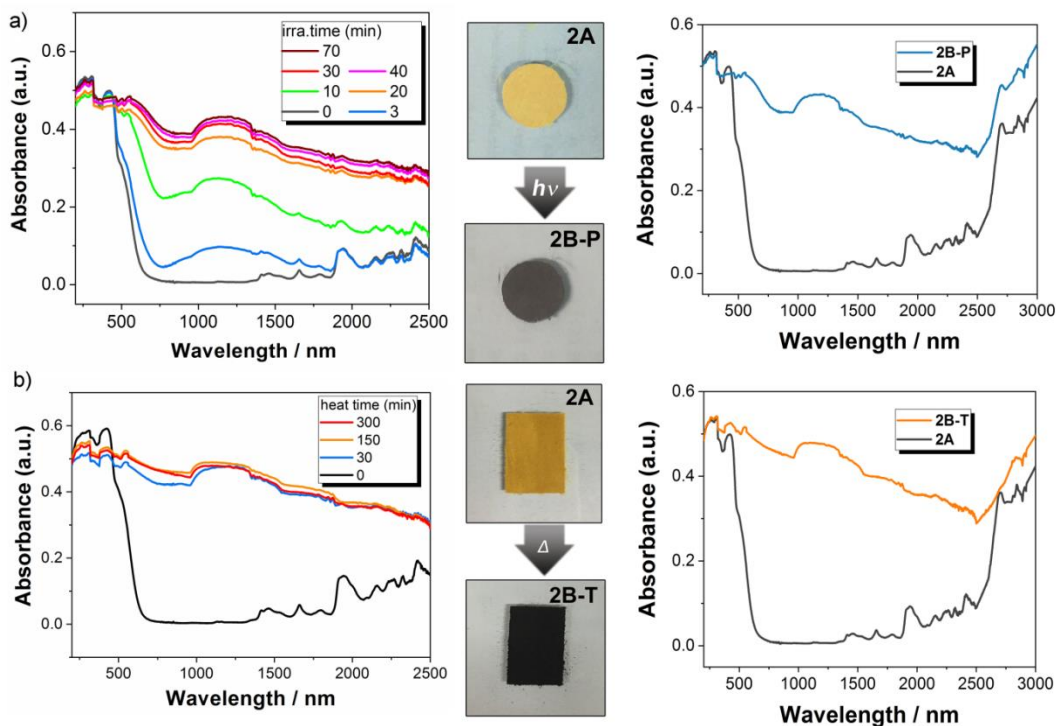

**Supplementary Fig. 3** Electron absorption spectra and color change of **2**. Time-dependent electron absorption spectra measured in the diffuse reflectance mode, color change, and combined UV/Visible/NIR spectra (200–2500 nm) and IR spectra (2500–3000 nm) of **2** upon irradiation at room temperature (a) or thermal annealing at 180 °C (b).

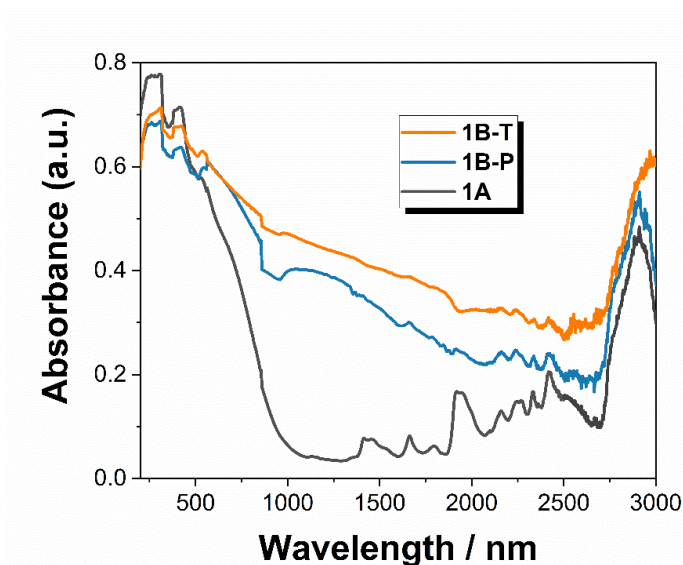

**Supplementary Fig. 4** Multispectral absorption of **1A**, **1B-P** and **1B-T**. Combined UV/Visible/NIR spectra (200–2500 nm) and IR spectra (2500–3000 nm) for **1A**, **1B-P**, and **1B-T**.

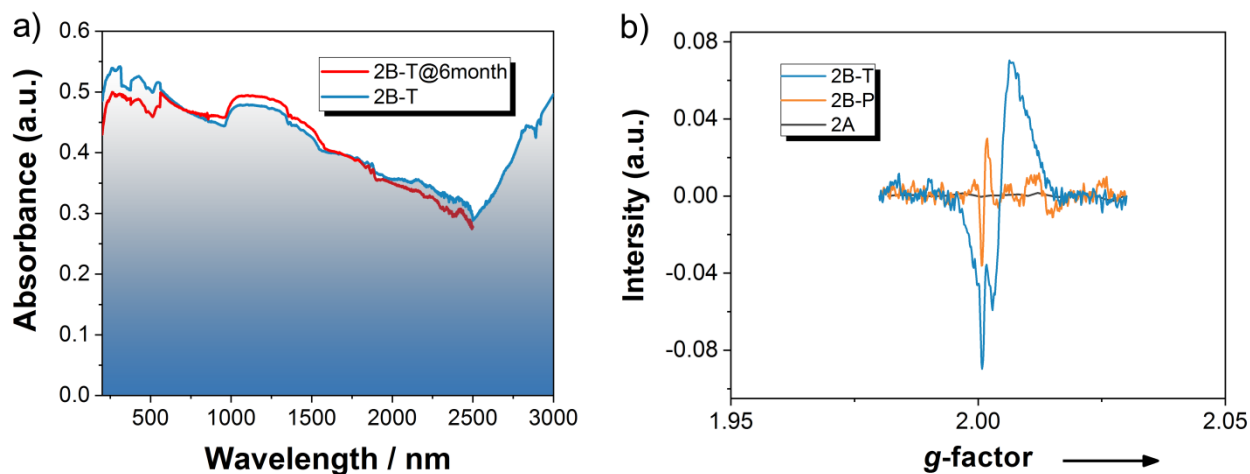

**Supplementary Fig. 5 Air-stability and ESR test.** a) Stability test for the thermo-induced sample **2B-T** monitored using UV/Visible/NIR spectra (200–2500 nm) and IR spectra (2500–3000 nm). The sample was placed in air in the dark at room temperature for 6 month. The minor difference between **2B-T** and **2B-T@6month** was attributed to systematic errors caused by instrumental instability or shift of the sample holder. b) ESR patterns for **2A**, **2B-P** and **2B-T**. Note: **2A** is as-prepared crystalline sample; **2B-P** is sample that was irradiated by an Xe lamp for 70 min; **2B-T** is sample that was thermally annealed at 180 °C for 150 min.

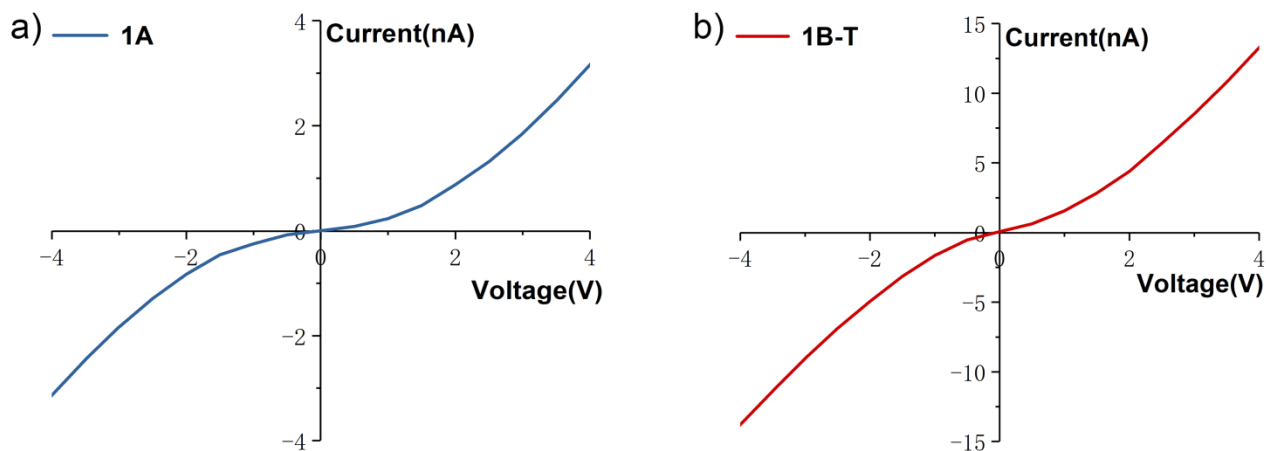

**Supplementary Fig. 6 Current–voltage ( $I$ – $V$ ) plots.**  $I$ - $V$  plots featured Ohmic connect at 298 K in air for **1A** (a) and **1B-T** (b).

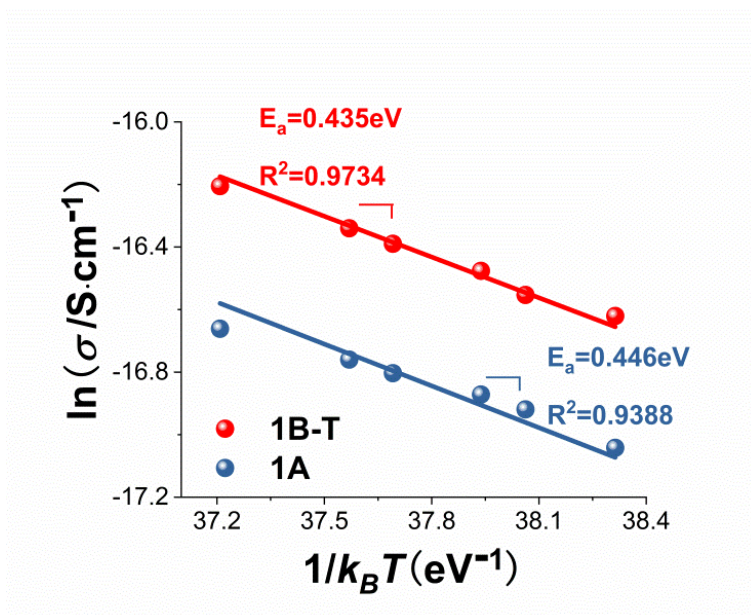

**Supplementary Fig. 7** Temperature-dependent conductivities of 1A and 1B-T.  $\ln\sigma = -E_a/k_B T + \text{constant}$ , where  $E_a$  is the activation energy,  $k_B$  is Boltzmann constant,  $T$  is temperature, and  $\sigma$  is conductivity.

a) Sample 1 (described in Figure 4)

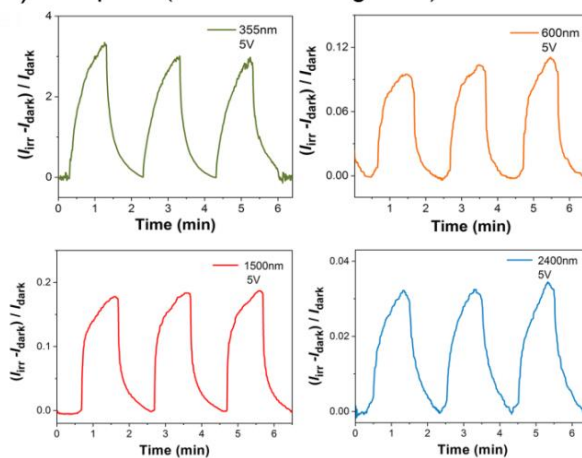

b) Sample 2

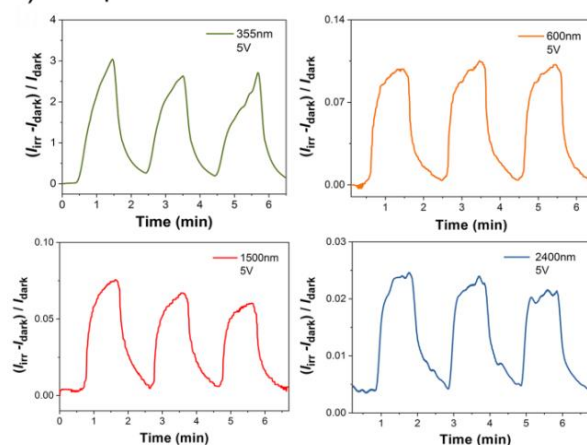

c) Sample 3

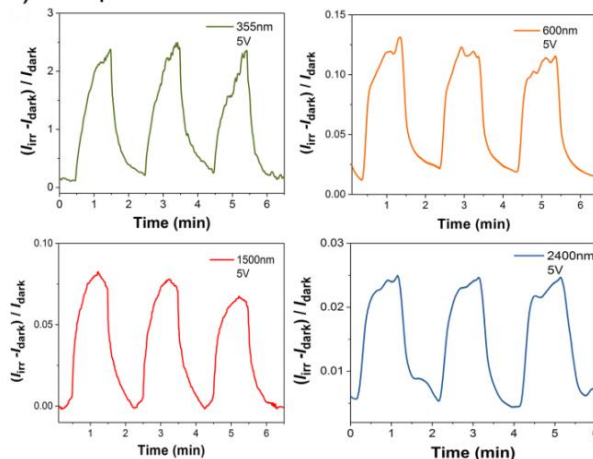

**Supplementary Fig. 8 Photoswitching behavior for three samples of 1B-T.** Power for each wavelength: a) 355 nm, 2.1 W; 600 nm, 5.0 mW; 1500 nm, 23 mW; 2400 nm, 6.0 mW; b) 355 nm, 2.1 W; 600 nm, 12 mW; 1500 nm, 12 mW; 2400 nm, 3.0 mW; c) 355 nm, 2.1 W; 600 nm, 16 mW; 1500 nm, 15 mW; 2400 nm, 3.5 mW.

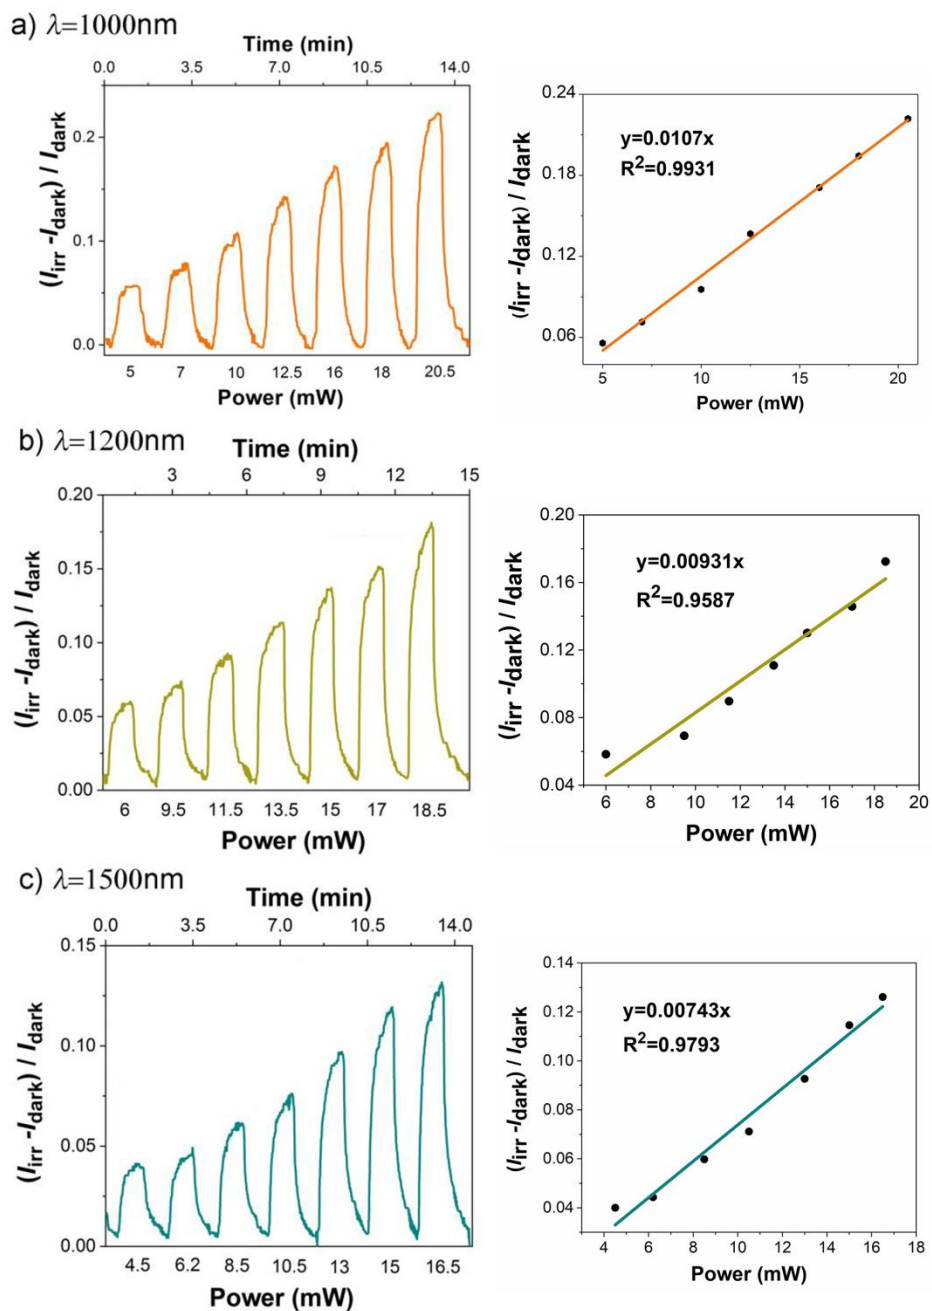

**Supplementary Fig. 9** Plot of relative photocurrent gain versus power. Laser power-dependent photoresponse behavior of **1B-T** with 1000 nm (a), 1200 nm (b) and 1500 nm (c) lasers, respectively. As can be seen, photocurrent gain shows a linear correlation to power, which means that a higher power density produces more carriers in a specific optical power range.

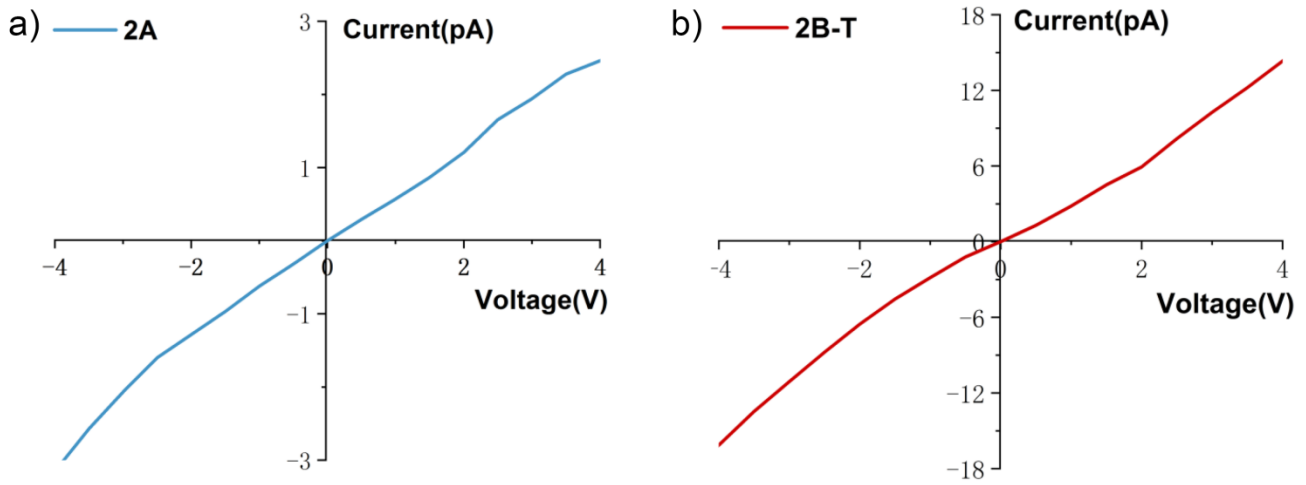

**Supplementary Fig. 10** Current–voltage ( $I$ – $V$ ) plots.  $I$ – $V$  plots featured Ohmic connect at 298 K in vacuum for **2A** (a) and **2B-T** (b).

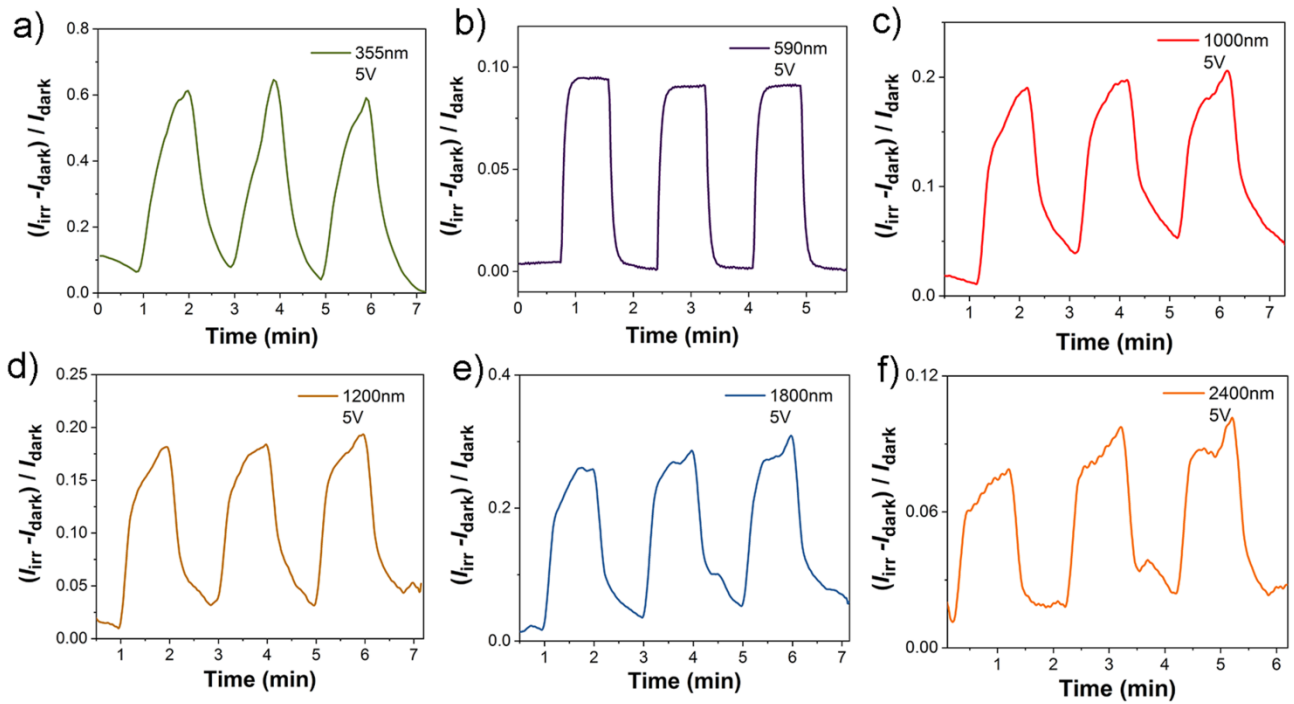

**Supplementary Fig. 11** Photoresponse behavior with different wavelengths of the **2B-T**. Power for each wavelength: a) 355 nm, 2.1 W; b) 590 nm, 19.2 mW; c) 1000 nm, 28 mW; d) 1200 nm, 25 mW; e) 1800 nm, 25 mW; f) 2400 nm, 7 mW.



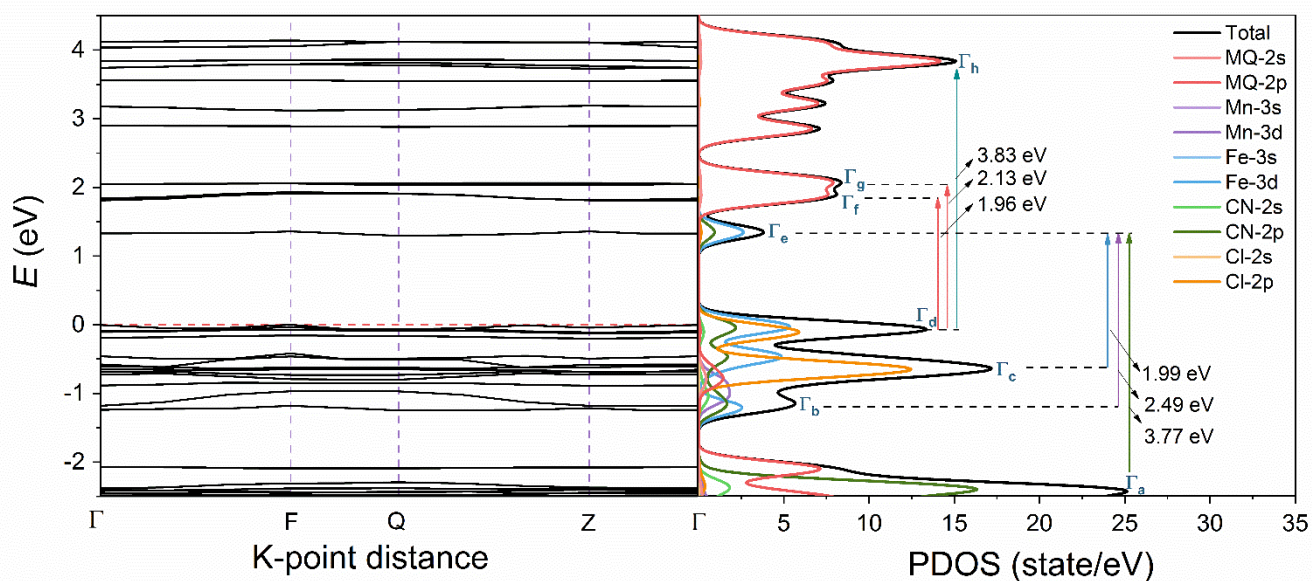

**Supplementary Fig. 12** Band structure and the density of states of **1**.  $\Gamma_a$ - $\Gamma_h$  denote the region maxima of the density of states.  $\Gamma_a \rightarrow \Gamma_e$ ,  $\Gamma_b \rightarrow \Gamma_e$ , and  $\Gamma_c \rightarrow \Gamma_e$  contain  $\text{CN} \rightarrow \text{Fe}^{\text{III}}$  charge-transfer, d-d transition band of  $\text{Fe}^{\text{III}}$  and MMCT, respectively.  $\Gamma_d \rightarrow \Gamma_f$ ,  $\Gamma_d \rightarrow \Gamma_g$ , and  $\Gamma_d \rightarrow \Gamma_h$  can be assigned to  $\text{Cl}^-/\text{CN}^-/\text{Fe}^{\text{III}} \rightarrow \text{MQ}^+$ . For the convenience of discussion, the up-spin bands and the down-spin bands are not given separately.

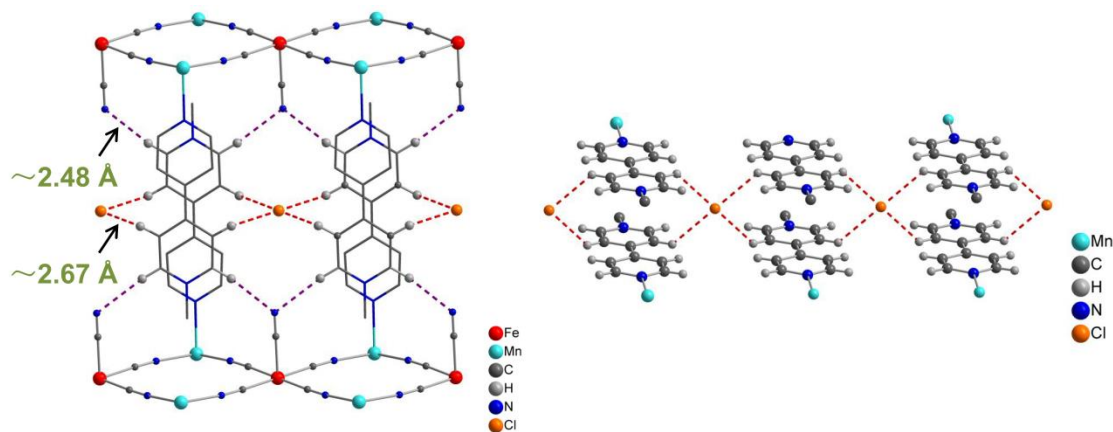

**Supplementary Fig. 13** Hydrogen-bonding diagram of **1**.

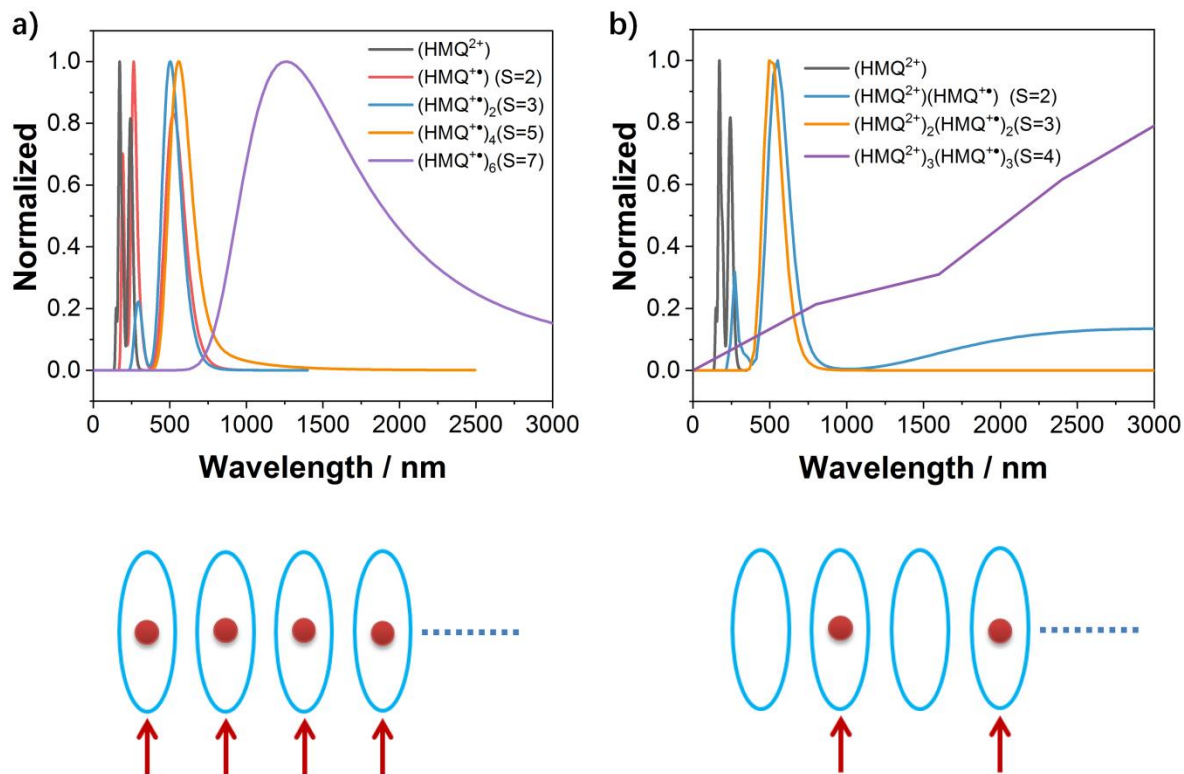

**Supplementary Fig. 14** Calculations of electron absorption spectra. The  $\pi$ -stacked  $[(\text{HMQ}^{2+})(\text{HMQ}^{\bullet+})]_n$  (a) and  $[(\text{HMQ}^{\bullet+})(\text{HMQ}^{\bullet+})]_n$  (b) moieties (n refers the number). The models were truncated from the sing-crystal structure and modified using H atoms to replace metal atoms.  $\text{HMQ}^{2+}$  = *N*-protonated *N'*-methyl 4,4'-bipyridinium.  $\text{HMQ}^{\bullet+}$  = one-electron reduced  $\text{HMQ}^{2+}$ . All calculations were performed at the pbe1pbe/6-31g\* level using the TD-DFT method.

## 2 Supplementary Tables.

**Supplementary table 1** Crystal and structure refinement data.

|                                                                | <b>1</b> (as-synthesized)                                            | <b>2</b> (as-synthesized)                                            |
|----------------------------------------------------------------|----------------------------------------------------------------------|----------------------------------------------------------------------|
| <b>Formula</b>                                                 | C <sub>28</sub> H <sub>28</sub> ClFeMnN <sub>10</sub> O <sub>3</sub> | C <sub>28</sub> H <sub>28</sub> ClFeZnN <sub>10</sub> O <sub>3</sub> |
| <b>M<sub>r</sub></b>                                           | 698.83                                                               | 709.27                                                               |
| <b>Crystal size (mm<sup>3</sup>)</b>                           | 0.2 × 0.16 × 0.13                                                    | 0.18 × 0.13 × 0.08                                                   |
| <b>Crystal system</b>                                          | Monoclinic                                                           | Monoclinic                                                           |
| <b>Space group</b>                                             | <i>P2/m</i>                                                          | <i>P2/m</i>                                                          |
| <b>a (Å)</b>                                                   | 7.332(4)                                                             | 7.332(4)                                                             |
| <b>b (Å)</b>                                                   | 7.688(3)                                                             | 7.688(3)                                                             |
| <b>c (Å)</b>                                                   | 13.528(7)                                                            | 13.528(7)                                                            |
| <b>β (deg)</b>                                                 | 98.064(14)                                                           | 98.064(14)                                                           |
| <b>V (Å<sup>3</sup>)</b>                                       | 755.0(6)                                                             | 755.0(6)                                                             |
| <b>D<sub>calcd</sub> (g/cm<sup>3</sup>)</b>                    | 1.510                                                                | 1.533                                                                |
| <b>Z</b>                                                       | 1                                                                    | 1                                                                    |
| <b>F(000)</b>                                                  | 358                                                                  | 363                                                                  |
| <b>Abs coeff (mm<sup>-1</sup>)</b>                             | 1.036                                                                | 1.408                                                                |
| <b>Reflns colld/unique (R<sub>int</sub>)</b>                   | 8130/1886 (0.0617)                                                   | 7142/1504 (0.0727)                                                   |
| <b>Data/params/restraints</b>                                  | 1886/121/0                                                           | 1504/121/6                                                           |
| <b>R<sub>1</sub><sup>a</sup></b>                               | 0.1216                                                               | 0.1167                                                               |
| <b>ωR<sub>2</sub><sup>b</sup></b>                              | 0.1569                                                               | 0.2132                                                               |
| <b>GOF on F<sup>2</sup></b>                                    | 1.057                                                                | 1.027                                                                |
| <b>Δρ<sub>max</sub> and Δρ<sub>min</sub> (e/Å<sup>3</sup>)</b> | 0.907 and -0.585                                                     | 1.258 and -0.609                                                     |

$${}^a R_1 = \sum ||F_o| - |F_c|| / \sum |F_o|, \quad {}^b \omega R_2 = \{ \sum \omega [(F_o)^2 - (F_c)^2]^2 / \sum \omega [(F_o)_2]^2 \}^{1/2}.$$

### 3 Supplementary Note 1:

#### Measurement of the relative spin density.

The relative spin density of **1** and **2** were measured using standard sample set in the instrument as a reference. The test conditions and methods are consistent with the standard sample. The following table shows the relative spin densities that are obtained by subtracting the recorded data to that of **1A** or **2A**. **1B-P/2B-P** are samples that were irradiated by an Xe lamp for 70 min; **1B-T/2B-T** are samples that were thermally annealed at 180 °C for 150 min.

#### Supplementary table 2 Relative spin densities.

| Sample name | Relative spin density / mol <sup>-1</sup> | Sample name | Relative spin density / mol <sup>-1</sup> |
|-------------|-------------------------------------------|-------------|-------------------------------------------|
| <b>1B-P</b> | $2.478 \times 10^{21}$                    | <b>2B-P</b> | $1.020 \times 10^{17}$                    |
| <b>1B-T</b> | $5.637 \times 10^{22}$                    | <b>2B-T</b> | $1.303 \times 10^{20}$                    |
